# Supplementary material
Source: PubMed Central journal article supplement (PMC4315941)
Supplement: NIHMS642945-supplement-Supplemental_figures_and_tables.pdf [file NIHMS642945-supplement-Supplemental_figures_and_tables.pdf]

Figure S1

a

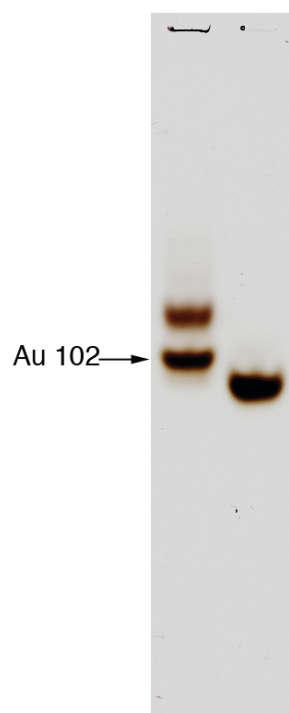

b

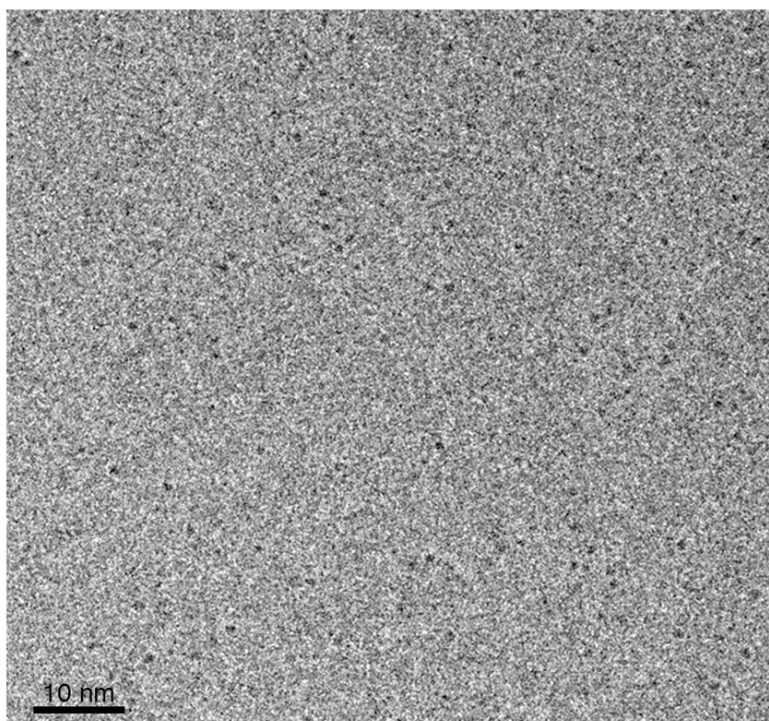

Figure S2

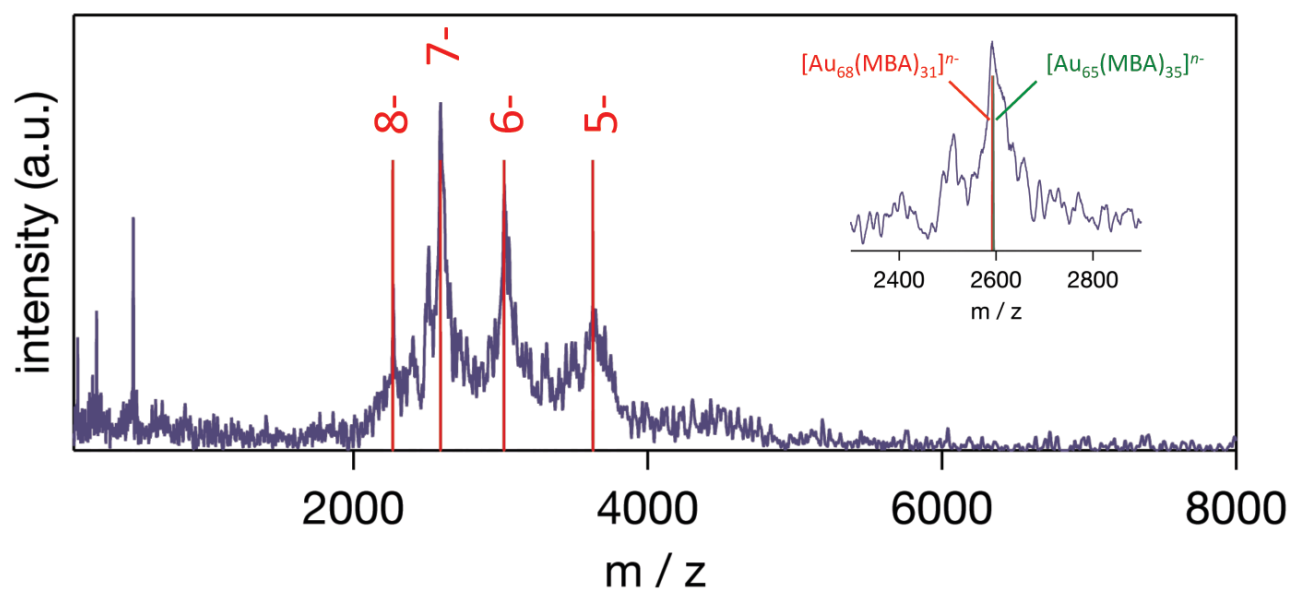

Figure S3

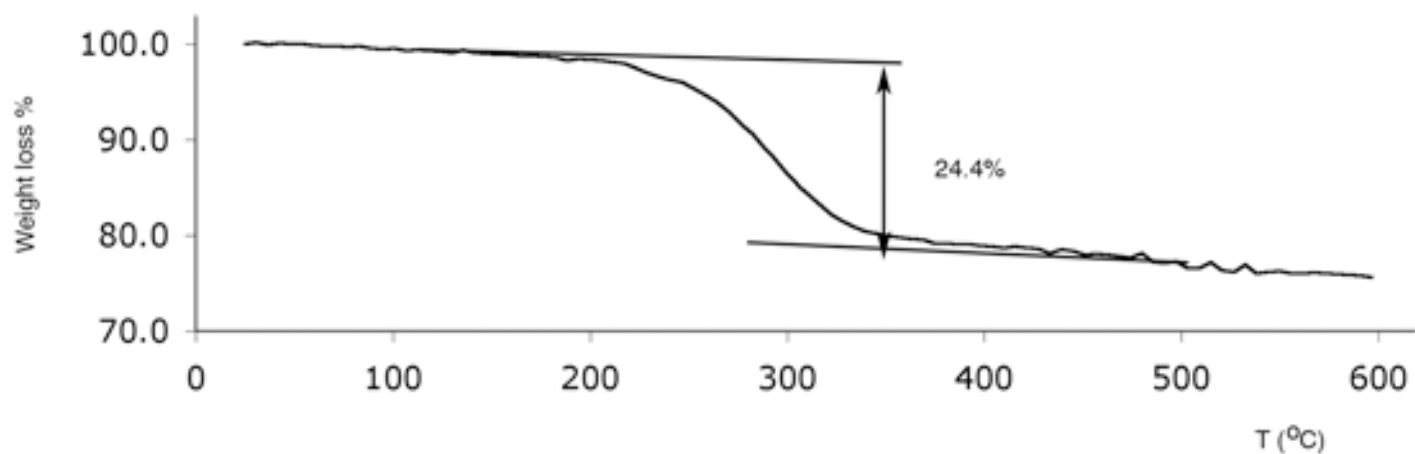

Figure S4

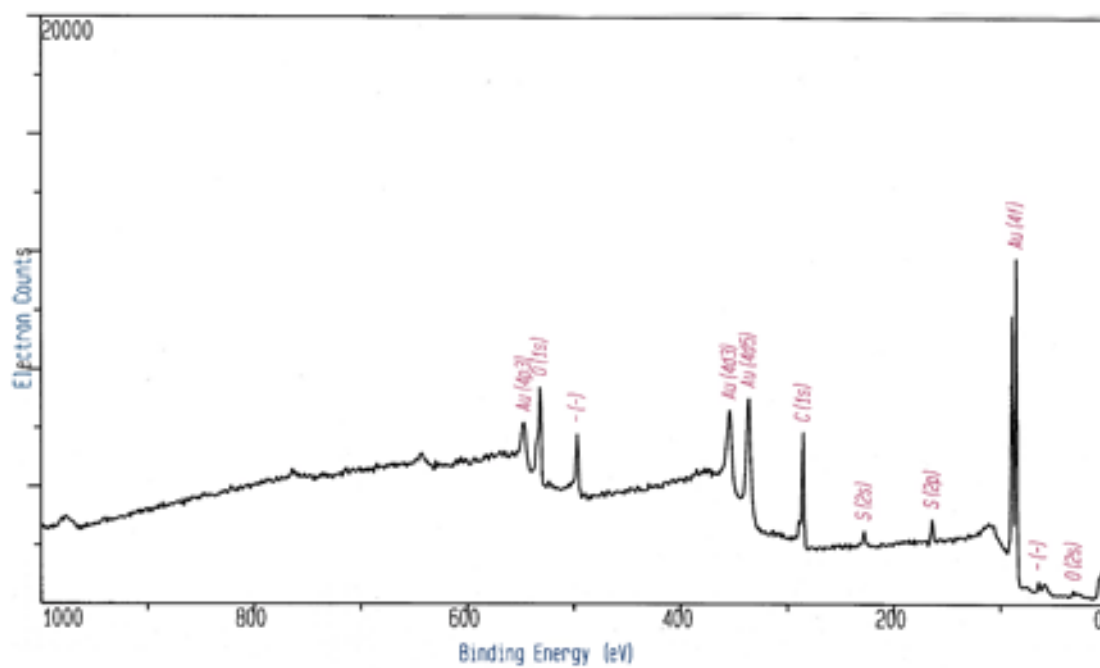

Figure S5

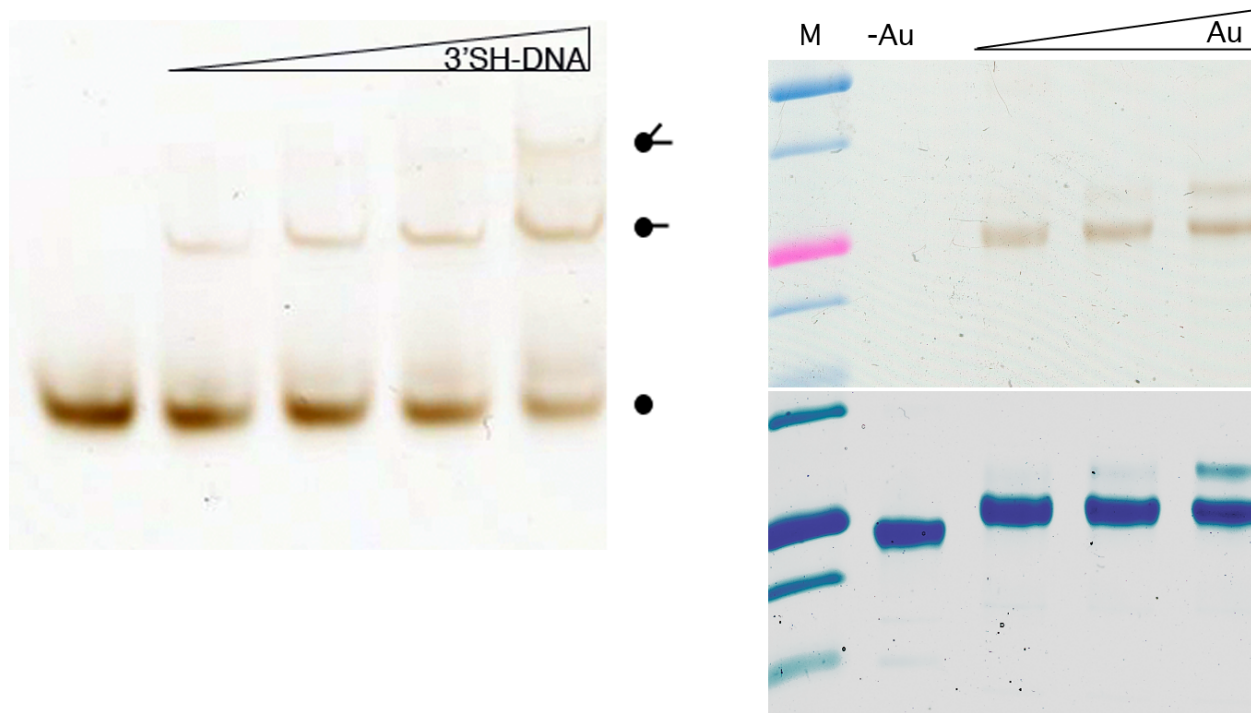

Figure 6S

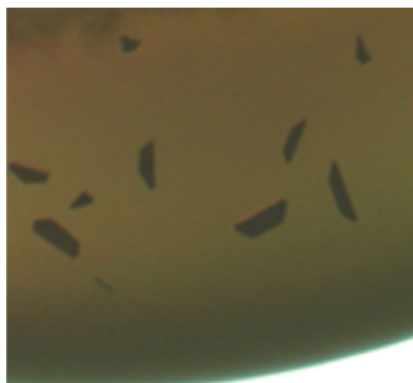

Figure S7

a

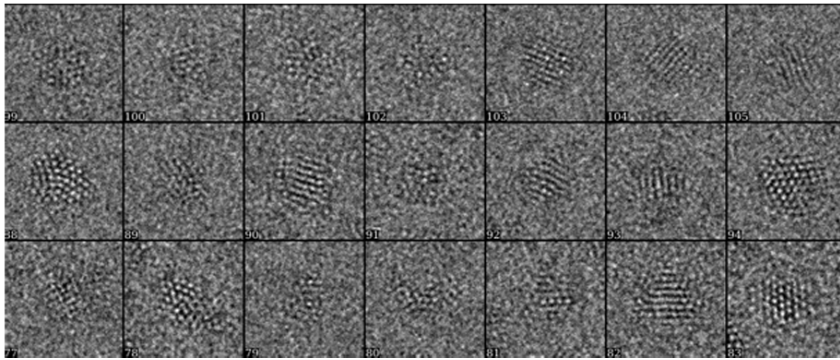

b

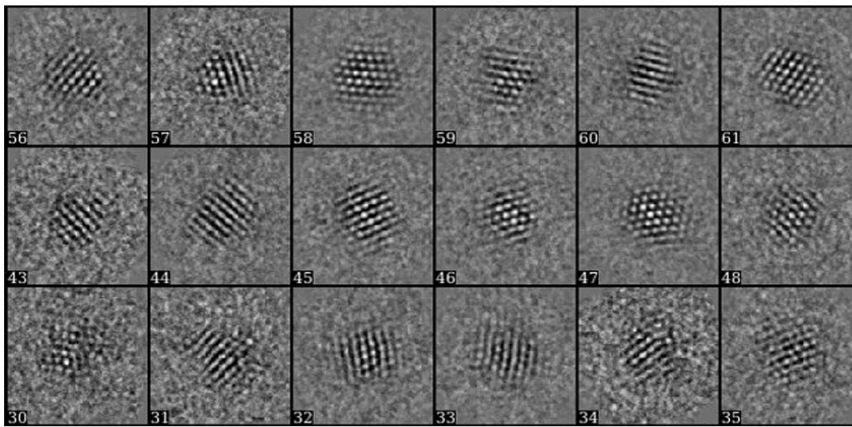

c

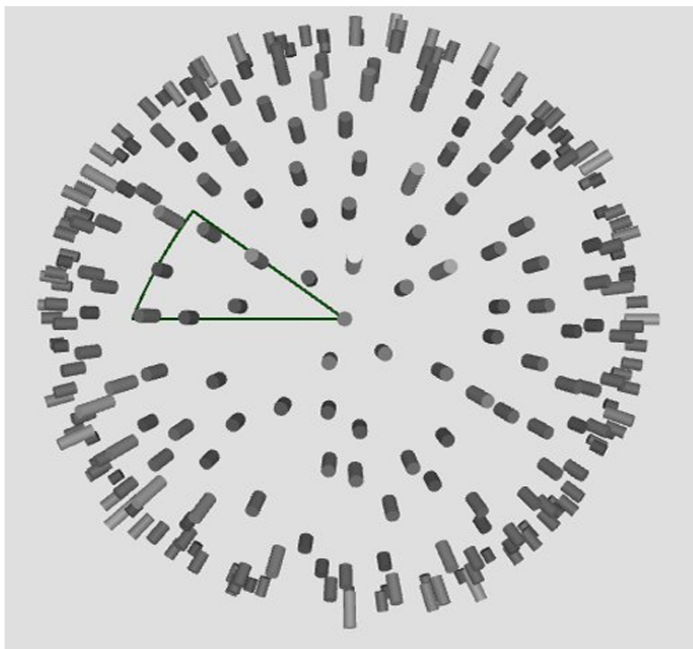

Figure S8

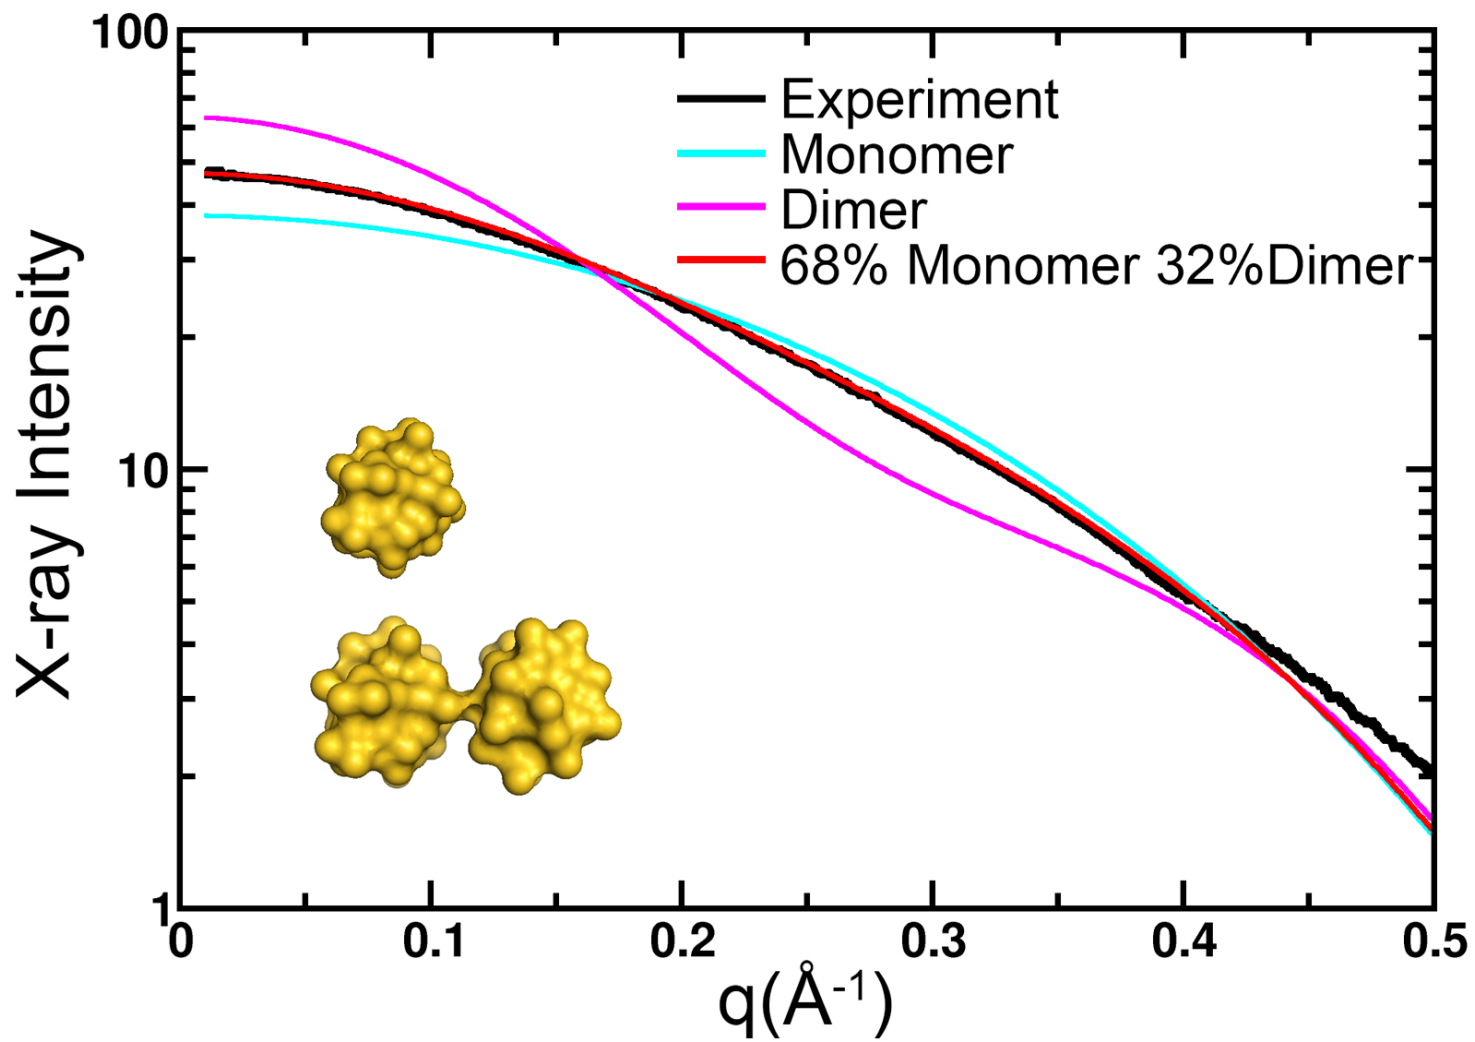

Figure S9

a

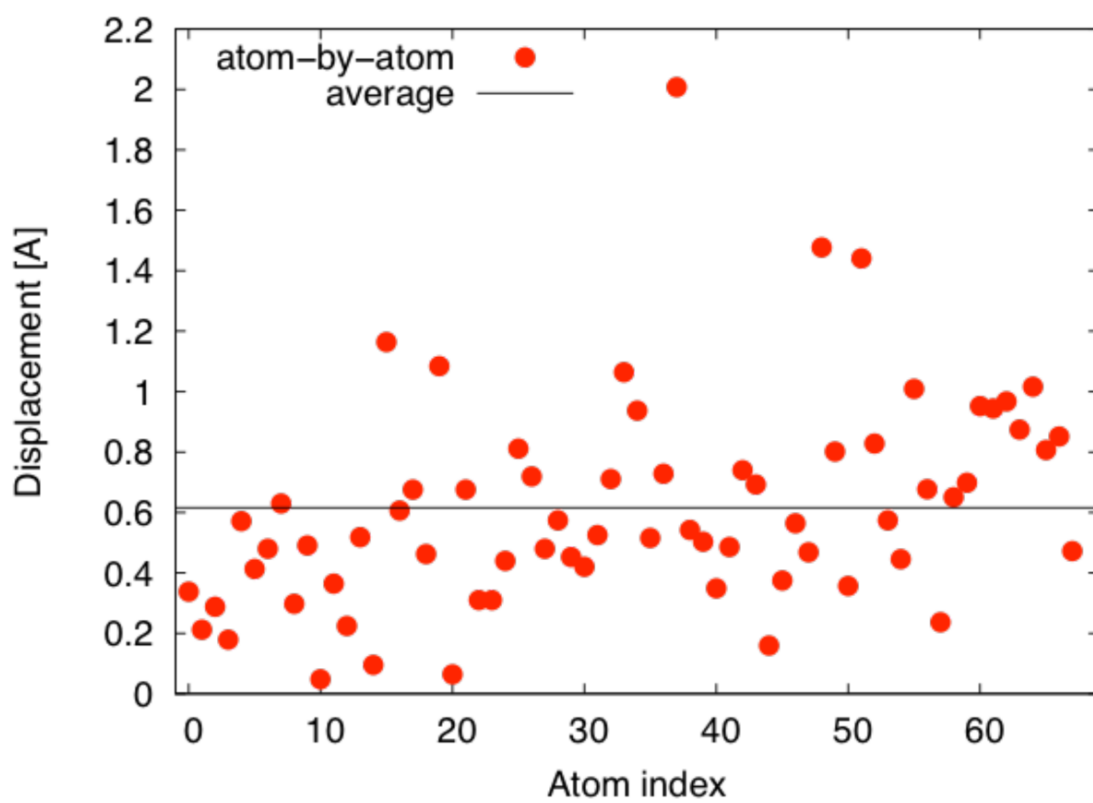

b

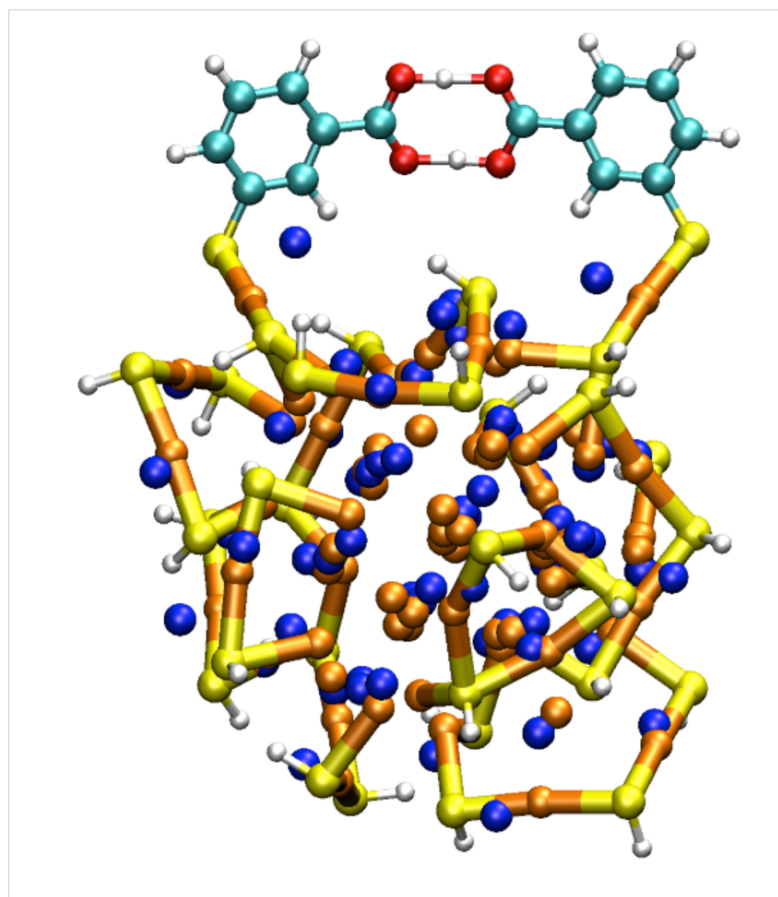

Figure S10

a

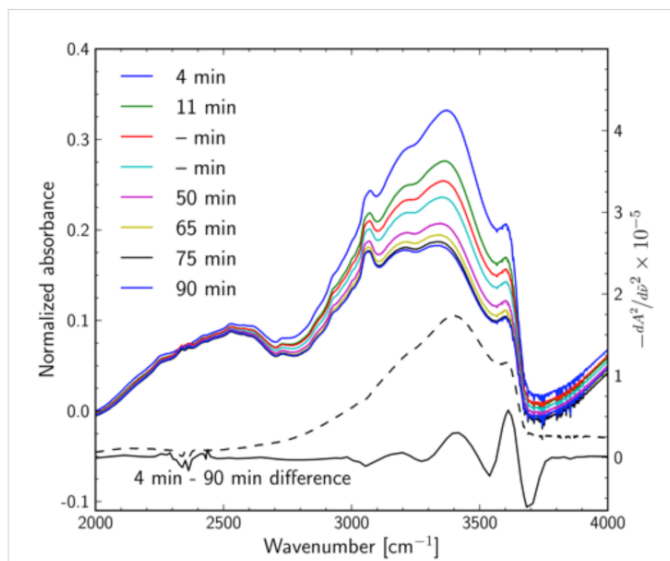

b

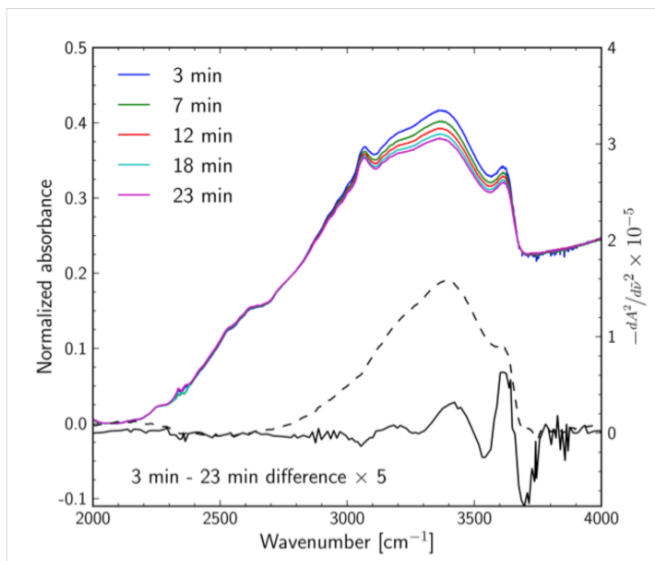

c

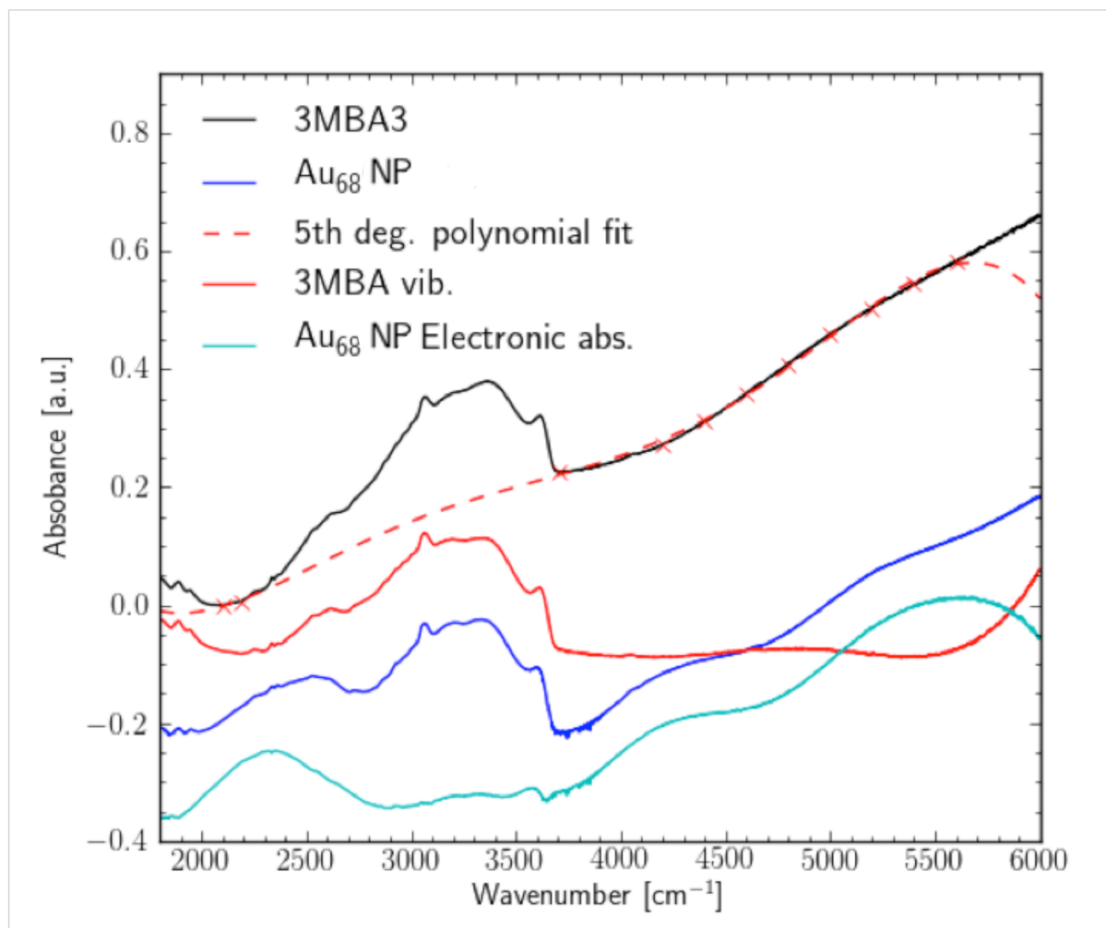

Figure S11

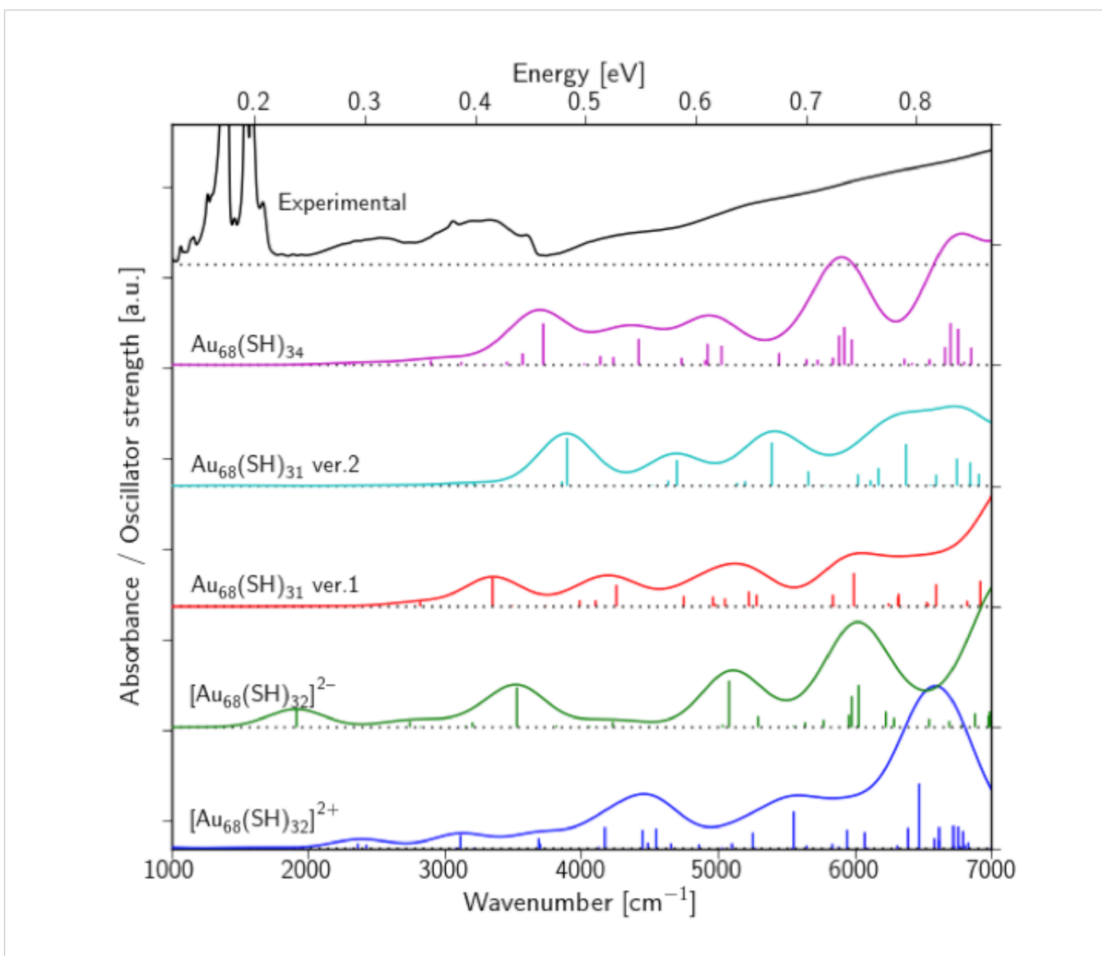

Figure S12

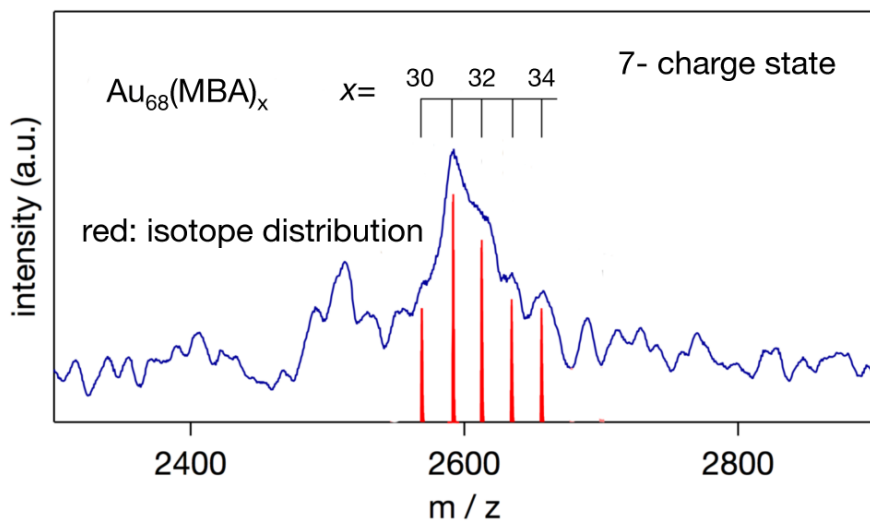



Table 1S

| Method | Measured | Expected for Au <sub>68</sub> (3MBA) <sub>32</sub> |
|--------|----------|----------------------------------------------------|
| TGA    | 24.4%    | 26.9%                                              |
| XPS    | 65.5%    | 68.0%                                              |
|        |          |                                                    |
| Method | Measured | Expected for Au <sub>68</sub> (3MBA) <sub>31</sub> |
| TGA    | 24.4%    | 26.3%                                              |
| XPS    | 65.5%    | 68.7%                                              |
